# Supplementary material for: An improved method for the measurement of lifetimes of long-lived coherences in NMR
Source: Royal Society of Chemistry journal article supplement (doi:10.1039/c4ra10535d), 2015-01-01
Supplement: c4ra10535d1.pdf [file c4ra10535d1.pdf]

## Supporting Information

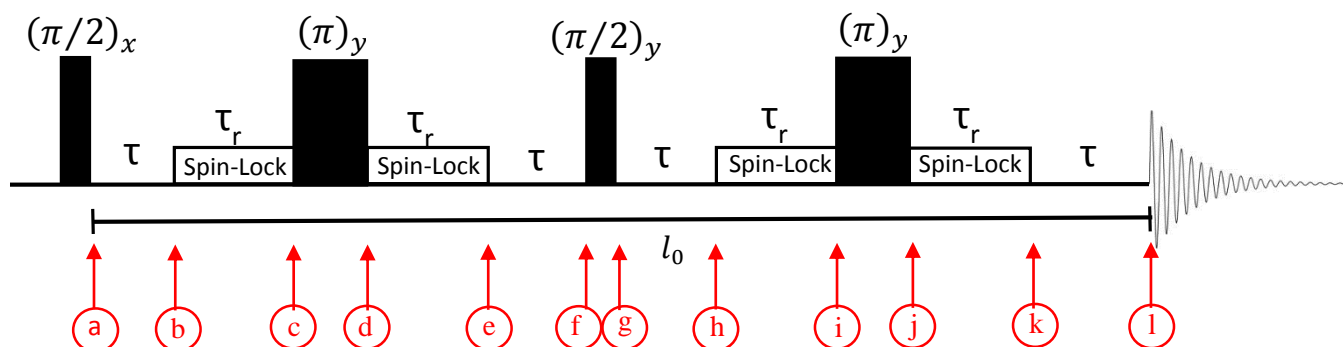

### (New improved LLC Sequence)

Delay  $\tau = 1/2\Delta\nu_{IS}$  and  $\tau_r = 1/4J$  where  $\Delta\nu_{IS}$  is the chemical shift difference and  $J$  is coupling constant.

(I) Product operators at different time points of pulse sequence are as following:

- a)  $-I_y - S_y$
- b)  $I_x - S_x$
- c)  $(I_x - S_x)\cos\theta + (2I_yS_z - 2I_zS_y)\sin\theta$
- d)  $(-I_x + S_x)\cos\theta - (2I_yS_z - 2I_zS_y)\sin\theta$
- e)  $-I_x(\cos^2\theta - \sin^2\theta) - 2I_yS_z(\sin 2\theta) + S_x(\cos^2\theta - \sin^2\theta) + 2I_zS_y(\sin 2\theta)$
- f)  $-I_y(\cos^2\theta - \sin^2\theta) + 2I_xS_z(\sin 2\theta) - S_y(\cos^2\theta - \sin^2\theta) + 2I_zS_x(\sin 2\theta)$
- g)  $-I_y(\cos^2\theta - \sin^2\theta) - 2I_zS_x(\sin 2\theta) - S_y(\cos^2\theta - \sin^2\theta) - 2I_xS_z(\sin 2\theta)$
- h)  $I_x(\cos^2\theta - \sin^2\theta) - 2I_yS_z(\sin 2\theta) - S_x(\cos^2\theta - \sin^2\theta) + 2I_zS_y(\sin 2\theta)$
- i)  $(\cos^2\theta - \sin^2\theta)[I_x\cos\theta + 2I_yS_z\sin\theta - S_x\cos\theta - 2I_zS_y\sin\theta] + \sin 2\theta[2I_zS_y\cos\theta - S_x\sin\theta - 2I_yS_z\cos\theta + I_x\sin\theta]$
- j)  $(\cos^2\theta - \sin^2\theta)[-I_x\cos\theta - 2I_yS_z\sin\theta + S_x\cos\theta + 2I_zS_y\sin\theta] + \sin 2\theta[-2I_zS_y\cos\theta + S_x\sin\theta + 2I_yS_z\cos\theta - I_x\sin\theta]$
- k)  $-I_x + S_x$  (here all the anti-phase terms got cancelled and we are left with only in-phase terms)
- l)  $-I_y - S_y$

The angle  $\theta$  in the above description is " $\theta = \pi J\tau_r$ ".

(II) Simulation of the new LLC sequence performed on GAMMA Simulation Platform showing the complete refocussing of coupling modulation. The parameters considered in simulation are:

- A spin system consisting of two weakly scalar coupled protons.
- Chemical shift difference = 50Hz.
- Scalar coupling constant = 5Hz.

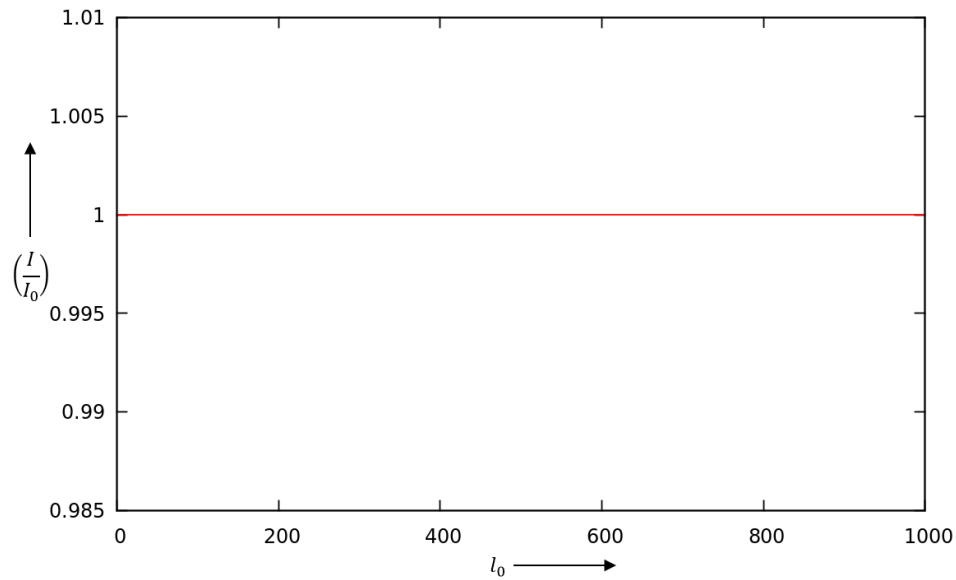

The above simulation shows the variation of normalized peak intensity in the LLC spectrum as a function of no of loops " $l_0$ " indicated in the sequence. It shows complete absence of any modulation in a weakly coupled spin-1/2 system. Relaxation is not included in the above simulation.

(III) Bruker Avance III pulse program for new improved LLC sequence:

**New LLC pulse sequence:**

```
;Maninder Singh. Narayanan D Kurur.  
;PE-LLC sequence  
;avance-version (21/07/14)  
;1D sequence
```

```
#include <Avance.incl>
```

```
"p2=p1+2"  
"p3=p1"  
"p25=((1s/4+cnst3))"  
"d6=1/(2+cnst2)"
```

```
1 ze  
2 30m  
  d1  
  p1 ph1  
3 d6 p127:f1  
  p25 ph25  
  5u p11:f1  
  p2 ph2  
  5u p127:f1  
  p25 ph25  
  d6 p11:f1  
  p3 ph3  
  d6 p127:f1  
  p25 ph25  
  5u p11:f1  
  p2 ph2  
  5u p127:f1  
  p25 ph25  
  d6  
  lo to 3 times l4  
  go=2 ph31  
  30m mc #0 to 2 F0(zd)  
exit
```

```
ph1=0 2 /* 90d */
ph2=1 /* 180d */
ph3=1 1 3 3 /*90d refocusing */
ph25=0 /* low power sustaining pulse */
ph31=0 2 0 2
```

```
;p11 : f1 channel - power level for pulse (default)
;p127 : f1 channel - power level for sustaining pulse
;p1 : f1 channel - high power 90 degree excitation pulse
;p2 : f1 channel - high power 180 degree refocusing pulse
;p3 : f1 channel - high power 90 degree refocusing pulse
;p25 : f1 channel - low power sustaining pulse
;d1 : relaxation delay; 1-5 * T1
;d6 : evolution interval to create (Ix-Sx)
;NS: 1 * n, total number of scans: NS * TDO
;cnst2: chemical shift difference
;cnst3: coupling constant
;l4: loop for LLC sustaining. Min value= 1 (2 echoes). Tllc sustaining time= 4*p25*14
```

(IV) Detailed analysis of new LLC sequence:

We have prepared 4 different samples of the Uridine-5'-monophosphate (UMP) of same concentration (0.01M) and measured the LLC lifetime using both normal LLC sequence and new LLC sequence as shown in Figure (1.(a) and (b)) in the main text. The results are shown in the TABLE 1 below:

TABLE. 1

| UMP Samples (0.01M) | Normal LLC lifetime (s)       | RMSE (Root mean square error) | $R^2$  |
|---------------------|-------------------------------|-------------------------------|--------|
| Sample 1            | 1.224                         | 0.0328                        | 0.9642 |
| Sample 2            | 1.240                         | 0.0325                        | 0.9677 |
| Sample 3            | 1.235                         | 0.0343                        | 0.9637 |
| Sample 4            | 1.162                         | 0.0340                        | 0.9588 |
|                     | New sequence LLC lifetime (s) |                               |        |
| Sample 1            | 1.409                         | 0.0194                        | 0.9938 |
| Sample 2            | 1.393                         | 0.0175                        | 0.9947 |
| Sample 3            | 1.429                         | 0.0189                        | 0.9951 |
| Sample 4            | 1.421                         | 0.0172                        | 0.9952 |

The above results shows that LLC lifetimes obtained using the new LLC sequence is longer and more accurate than normal LLC sequence. Further, the standard deviation of LLC lifetime for both the sequences were calculated and found to be 0.0313 (normal LLC sequence) and 0.0136 (new LLC sequence) which confirms our conclusions. The mean values for LLC lifetime is 1.215 s (normal LLC sequence) and 1.413 s (new LLC sequence). All these values were obtained by fitting the experimental data on **MATLAB R2013b** software using curve fitting tool.
